# Supplementary material for: Mechanistic insights of O-GlcNAcylation that promote progression of cholangiocarcinoma cells via nuclear translocation of NF-κB
Source: PubMed Central journal article supplement (PMC4904198; doi:10.1038/srep27853), 2016-06-13
Supplement: srep27853-s1.pdf [file srep27853-s1.pdf]

# **Mechanistic insights of O-GlcNAcylation that promote progression of cholangiocarcinoma cells via nuclear translocation of NF- $\kappa$ B**

Chatchai Phoomak<sup>1,3</sup>, Kulthida Vaeteewoottacharn<sup>1,3</sup>, Kanlayanee Sawanyawisuth<sup>1,3</sup>,  
Wunchana Seubwai<sup>2,3</sup>, Chaisiri Wongkham<sup>1,3</sup>, Atit Silsirivanit<sup>1,3\*</sup>, Sopit Wongkham<sup>1,3\*</sup>

<sup>1</sup>Department of Biochemistry, Faculty of Medicine, Khon Kaen University, Khon Kaen, 40002, Thailand.

<sup>2</sup>Department of Forensic Medicine, Faculty of Medicine, Khon Kaen University, Khon Kaen, 40002, Thailand.

<sup>3</sup>Liver Fluke and Cholangiocarcinoma Research Center, Faculty of Medicine, Khon Kaen University, Khon Kaen, 40002, Thailand.

## **Corresponding authors:**

Atit Silsirivanit, Ph.D.

Department of Biochemistry,  
Faculty of Medicine, Khon Kaen University,  
Khon Kaen, 40002, Thailand

Tel/Fax: +66-43-348-386

Email address: [atitsil@kku.ac.th](mailto:atitsil@kku.ac.th)

Sopit Wongkham, Ph.D.

Department of Biochemistry,  
Faculty of Medicine, Khon Kaen  
University, Khon Kaen, 40002, Thailand

Tel/Fax: +66-43-348-386

Email address: [sopit@kku.ac.th](mailto:sopit@kku.ac.th)

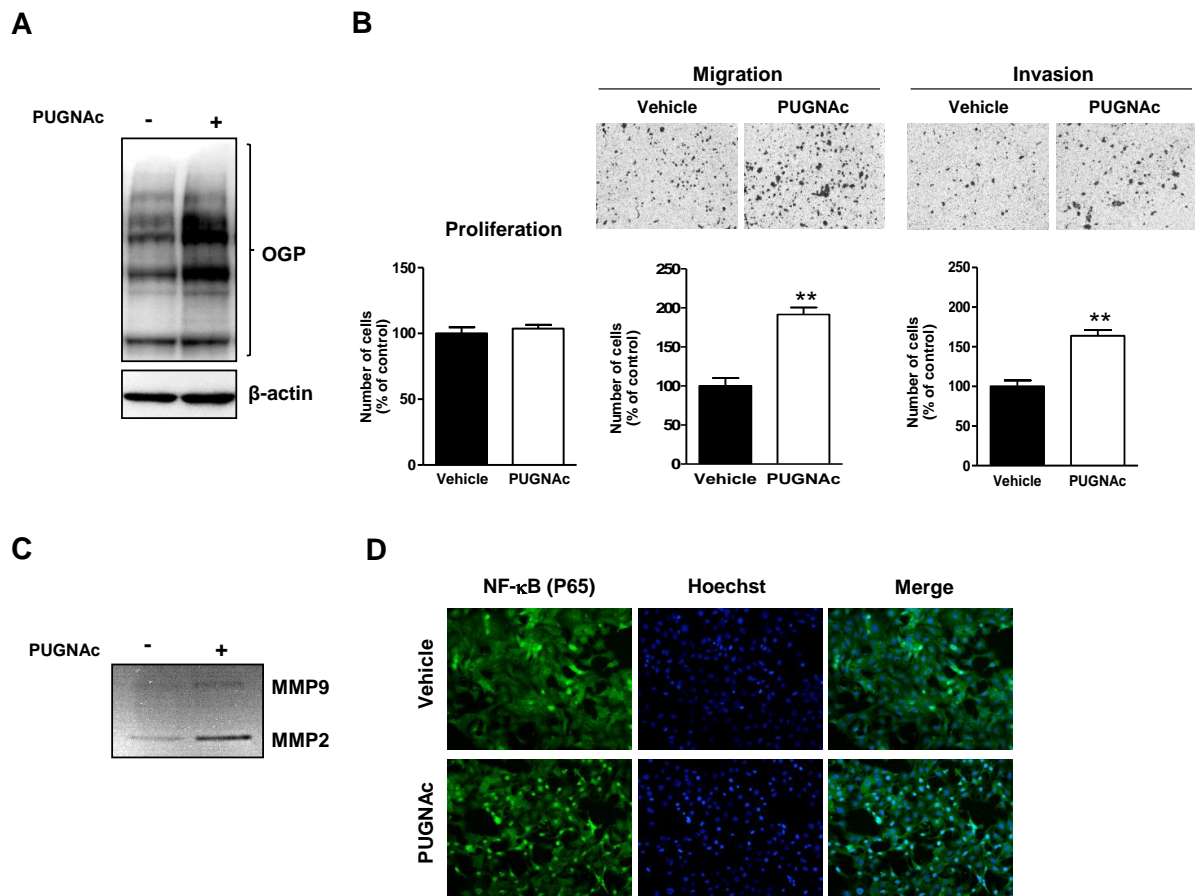

**Supplementary Figure S1.** Increasing O-GlcNAcylation in KKKU-100 using PUGNac yielded similar effects as siOGA treated cells. The CCA cell line, KKKU-100, was treated with PUGNac, a well-known OGA inhibitor, for 24 h. The effects of O-GlcNAcylation of PUGNac treated and the control cells were compared on (A) Western blotting of O-GlcNAcylated products (OGP), (B) cell growth, migration and invasion observed at 28 h, (C) MMP2 and MMP9 zymogram and (D) nuclear translocation of NF-κB.

**Supplementary Table S1: Primers for determination of genes using real-time PCR**

| Gene          | Ref. No.       | Forward                       | Reverse                       |
|---------------|----------------|-------------------------------|-------------------------------|
| <i>CDH1</i>   | NM_004360      | 5'-CTTAGAGGTCAGCGTGTG-3'      | 5'-AGCAAGAGCAGCAGAATC-3'      |
| <i>CDH2</i>   | NM_007664.4    | 5'-CCTGAGGGATCAAAGCCTGG-3'    | 5'-ACATGTTGGGTGAAGGGGTG-3'    |
| <i>FN1</i>    | NM_002026.2    | 5'-TGGTGTACACAGAGGCTACTAT-3'  | 5'-GAAGGGTTACCAGTTGGGGA-3'    |
| <i>ITGA5</i>  | NM_002205.2    | 5'-GATGCCCTACCGAATCCTGC-3'    | 5'-TGATGATCCACAGTGGGACG-3'    |
| <i>ITGB1</i>  | NM_002211.3    | 5'-GAGTCGCGAACAGCAGG-3'       | 5'-AGCAAACACACAGCAAACCTGA-3'  |
| <i>MMP2</i>   | NM_001127891.1 | 5'-TGTTAGGCAAGTGACTTCTCAGT-3' | 5'-AACAGGTTGCAGCTCTCCTT-3'    |
| <i>MMP3</i>   | NM_002422.3    | 5'-AGACTTTCAGGGATTGACTC-3'    | 5'-ACAATTAAGCCAGCTGTTACTCT-3' |
| <i>MMP7</i>   | NM_002423.3    | 5'-GATAAGCACTGTTCTCCAC-3'     | 5'-CACAGTCACACCATAAAGGA-3'    |
| <i>MMP9</i>   | NM_004994.2    | 5'-ACGCACGACGTCTTCCAGTA-3'    | 5'-CTTGGTCCACCTGGTTCAACT-3'   |
| <i>PAI1</i>   | NM_000602.4    | 5'-CAGGACGAACCGCCAATCG-3'     | 5'-CAGGTGGGCCACGTAGGATG-3'    |
| <i>SNAI2</i>  | NM_003068.4    | 5'-ACAGCGAACTGGACACACAT-3'    | 5'-GCGGTAGTCCACACAGTGAT-3'    |
| <i>OPN</i>    | NM_000582.2    | 5'-GCGAGGAGTTGAATGGTG-3'      | 5'-ATAATCTGGACTGCTTGTGG-3'    |
| <i>TIMP1</i>  | NM_003254.2    | 5'-GCTTCTGGCATCCTGTTGTTG-3'   | 5'-GGTCTGGTTGACTTCTGGTGT-3'   |
| <i>TIMP2</i>  | NM_003255.4    | 5'-ACCCTCTGTGACTTCATCGTG-3'   | 5'-CGTCCGGGAGGAGATGTAG-3'     |
| <i>TWIST1</i> | NM_000474.3    | 5'-GGAGTCCGAGTCTTACGAG-3'     | 5'-TCTGGAGGACCTGGTAGAGG-3'    |
| <i>VCAN</i>   | NM_004385      | 5'-GGCACCTGTTATCCTACTG-3'     | 5'-GTCTCGGTATCTTGCTCAC-3'     |
| <i>VIM</i>    | NM_003380.3    | 5'-AACTTTTCTCCCTGAACCTGAG-3'  | 5'-TCAAGGTCATCGTGATGCTGAG-3'  |
| <i>B2M</i>    | AK022379       | 5'-AAGATGAGTATGCCTGCCG-3'     | 5'-CGGCATCTTCAAACCTCC-3'      |

**Supplementary Table S2:** Relative expression of metastasis associated genes in KKU-213 treated with siOGT or siOGA

| <b>Genes</b>                 | <b>siOGT</b> | <b><i>P</i></b> | <b>siOGA</b> | <b><i>P</i></b> |
|------------------------------|--------------|-----------------|--------------|-----------------|
| E- cadherin (CDH1)           | 0.59         | 0.007           | 0.72         | <0.001          |
| Fibronectin (FN1)            | 0.97         | 0.530           | 1.14         | 0.315           |
| Integrin- $\alpha$ 5 (ITGA5) | 0.57         | <0.001          | 1.18         | 0.014           |
| Integrin- $\beta$ 1 (ITGB1)  | 0.65         | <0.001          | 1.21         | 0.006           |
| MMP2                         | 0.69         | 0.005           | 1.60         | <0.001          |
| MMP3                         | 0.81         | <0.001          | 0.89         | 0.023           |
| MMP7                         | 0.58         | <0.001          | 1.43         | 0.015           |
| MMP9                         | 1.50         | <0.001          | 2.81         | <0.001          |
| N-cadherin (CDH2)            | 0.88         | 0.003           | 1.07         | 0.182           |
| Osteopontin (OPN)            | 1.56         | 0.002           | 1.32         | 0.049           |
| Serpine 1 (PAI-1)            | 0.72         | <0.001          | 1.67         | 0.008           |
| Slug (SNAI2)                 | 0.88         | 0.003           | 1.15         | 0.072           |
| TIMP1                        | 0.84         | <0.001          | 0.89         | 0.249           |
| TIMP2                        | 0.82         | <0.001          | 1.10         | 0.022           |
| Twist                        | 0.94         | 0.198           | 1.06         | 0.680           |
| Versican (VCAN)              | 0.95         | 0.291           | 0.90         | 0.049           |
| Vimentin (VIM)               | 1.11         | <0.001          | 1.28         | 0.006           |
